1 Large-scale experimental removal of non-native slider turtles has unexpected consequences on  
2 basking behavior for both conspecifics and a native, threatened turtle

3  
4 Max R. Lambert<sup>a,b,c\*</sup>, Jennifer M. McKenzie<sup>a,b,d</sup>, Robyn M. Screen<sup>a,b,e</sup>, Adam G. Clause<sup>b,f</sup>,  
5 Benjamin J. Johnson<sup>b,g</sup>, Genevieve G. Mount<sup>b,h</sup>, H. Bradley Shaffer<sup>b,i</sup>, and Gregory B. Pauly<sup>b,j</sup>

6 <sup>a</sup>Authors contributed equally to the work and are listed alphabetically

7 <sup>b</sup>Address where research occurred: University of California, Davis, One Shields Ave, Davis, CA  
8 95616, USA

9 Present Addresses:

10 <sup>c</sup>School of Forestry and Environmental Studies, Yale University, 370 Prospect St, New Haven,  
11 CT 06511, USA. Email: [lambert.mrm@gmail.com](mailto:lambert.mrm@gmail.com)

12 <sup>d</sup>Department of Forestry and Natural Resources, University of Kentucky, 214 T.P. Cooper  
13 Building, Lexington, KY 40546-0073, USA. Email: [mckenziemjenn@gmail.com](mailto:mckenziemjenn@gmail.com)

14 <sup>e</sup>Department of Biology, University of Hawaii, Manoa, 2538 McCarthy Mall, Honolulu, HI  
15 96822. Email: [rmscreen@hawaii.edu](mailto:rmscreen@hawaii.edu)

16 <sup>f</sup>Warnell School of Forestry and Natural Resources, University of Georgia, 180 East Green St,  
17 Athens, GA 30677, USA. Email: [adamclause@gmail.com](mailto:adamclause@gmail.com)

18 <sup>g</sup>Department of Ecology and Evolutionary Biology, Cornell University, Corson Hall, Ithaca, NY  
19 14853, USA. Email: [bbj23@cornell.edu](mailto:bbj23@cornell.edu)

20 <sup>h</sup>Biology Department, Louisiana State University, 202 Life Sciences Building, Baton Rouge, LA  
21 70803, USA. Email: [ggmountt@gmail.com](mailto:ggmountt@gmail.com)

22 <sup>i</sup>Department of Ecology and Evolutionary Biology, and La Kretz Center for California  
23 Conservation Science, Institute of the Environment and Sustainability, University of California,  
24 Los Angeles, CA 90095, USA. Email: [brad.shaffer@ucla.edu](mailto:brad.shaffer@ucla.edu)

25 <sup>j</sup>Urban Nature Research Center, and Section of Herpetology, Natural History Museum of Los  
26 Angeles County, 900 Exposition Blvd, Los Angeles, CA 90007, USA. Email: [gpauly@nhm.org](mailto:gpauly@nhm.org)

27 \*Corresponding Author: [max.lambert@yale.edu](mailto:max.lambert@yale.edu) or [lambert.mrm@gmail.com](mailto:lambert.mrm@gmail.com). Phone: +1 (619)  
28 990-7242

29

30

31

32

33

34

35

36

37

38

39 **Abstract:**

40 The red-eared slider turtle (*Trachemys scripta elegans*; RES) is one of the world's most invasive  
41 species. Native to the central United States, RES are now widely established in freshwater  
42 habitats across the globe, largely due to release of unwanted pets. Laboratory and mesocosm  
43 experiments suggest that introduced RES are competitively dominant to native turtles, but such  
44 competition remains untested in the wild. Here, we experimentally removed introduced RES to  
45 test whether they compete for critical basking habitat with native, threatened western pond turtles  
46 (*Emys marmorata*; WPT), a species being considered for listing under the U.S. Endangered  
47 Species Act. Following removal, we found that both the remaining RES as well as WPT altered  
48 their basking distribution but in a manner inconsistent with strong interspecific competition.  
49 However, these findings suggest strong intraspecific competition for basking sites amongst RES  
50 and that interspecific competition between WPT and introduced RES likely occurs at higher RES  
51 densities. Our works suggests RES influence the behavior of native species in the wild and  
52 indicates that RES removal may be most beneficial at high RES densities. This experiment  
53 highlights the importance of considering experimental venue when evaluating competition  
54 between native and non-native species and should encourage conservation biologists to treat  
55 removal efforts as experiments.

56 **KEYWORDS:** *Actinemys*, *Emys marmorata*, experimental venue, invasive species, *Trachemys*  
57 *scripta elegans*, UC Davis Arboretum

58

59

60

## 61 **1.0 Background**

62 Invasive species are a major threat to biodiversity (Simberloff et al. 2013) and are an ongoing  
63 concern for conservation practitioners (Kuebbing and Simberloff 2015). One species widely  
64 considered harmful to native species worldwide is the red-eared slider turtle (*Trachemys scripta*  
65 *elegans*; RES). This species is native to the central United States but is now present on every  
66 continent except Antarctica, predominantly because of releases of unwanted pet turtles (Arvy  
67 1997, Cadi et al. 2008, Kraus 2009, Rhodin et al. 2017). The widespread continued introduction  
68 of this species led the International Union for Conservation of Nature (IUCN) to name RES as  
69 one of the “worst invasive species” in the world (Lowe et al. 2000). However, despite long-held  
70 concerns about the effects of introduced RES on native turtle species (Arvy and Servan 1998,  
71 Cadi et al. 2008), few studies have explicitly explored the consequences of RES introductions on  
72 wild, native turtle populations (Lambert et al. 2013, Pearson et al. 2013, Costa 2014, H eritier et  
73 al. 2017) and there have been no experiments on wild populations.

74 Laboratory and mesocosm experiments suggest that RES can outcompete native turtles  
75 for food and basking sites (Cadi and Joly 2003, 2004, Polo-Cavia et al. 2008, 2010, 2011,  
76 Pearson et al. 2015). While these simplified, semi-natural experiments allow us to begin isolating  
77 causal agents, they also frequently inflate the effects of interspecific competition compared to *in*  
78 *situ* manipulations under more natural conditions (Skelly and Kiesecker 2001, Skelly 2002,  
79 Winkler and Van Buskirk 2012). Although we recognize that *in situ* experiments come with their  
80 own drawbacks, comparing laboratory and mesocosms experiments with field manipulations is  
81 critical to understanding the strength of species interactions in wild contexts. To our knowledge,  
82 no study has yet experimentally tested whether RES are an important competitor with any native  
83 turtle species in the wild.

84           Basking sites are a key resource for evaluating competition between aquatic turtle species  
85 because these sites are critical for proper thermoregulation, which directly influences vital  
86 physiological parameters like disease control as well as growth and reproductive rates (Ernst and  
87 Lovich 2009). Basking sites have repeatedly been identified as a likely axis of competition  
88 between introduced RES and native turtle species, with several laboratory and mesocosm  
89 experiments suggesting that RES may exhibit dominant aggressive behaviors while basking and  
90 may displace native turtles from basking sites (Cadi and Joly 2003, Polo-Cavia et al. 2010,  
91 Pearson et al. 2015). In human-modified waterways, competition for basking sites may be  
92 especially pronounced because turtles often experience reductions in basking site availability due  
93 to the removal of basking objects for flood control and aesthetic reasons (Spinks et al., 2003).

94           One study in the University of California, Davis (UCD) Arboretum waterway found that  
95 RES and native western pond turtles (*Emys marmorata*; WPT) are spatially segregated across  
96 basking sites (Lambert et al. 2013). Although both RES and WPT sometimes bask at the same  
97 sites (Fig. 1), they tended to concentrate in opposite ends of the waterway and at basking sites  
98 that differ in slope, water depth adjacent to the site, site substrate, and the degree of human  
99 activity (Lambert et al. 2013). It is unclear, however, whether these interspecific differences in  
100 basking site use are due to innate preferences or competitive interactions. Because of the  
101 biological importance of basking sites in WPT life history (Bury and Germano 2008, Ernst and  
102 Lovich 2009), determining whether RES limit WPT use of preferred basking habitat is essential  
103 for effective conservation (Thomson et al. 2016), particularly given the widespread occurrence of  
104 introduced RES in California (Thomson et al. 2010, Fisher unpubl.)

105           Here, we present the results of an *in situ* field experiment whereby we dramatically  
106 reduced the UCD Arboretum RES population to examine whether WPT subsequently shifted

107 their use of available basking sites in the wild. Our experiment explicitly tests whether invasive  
108 species removal, an intensive and commonly-advocated management practice (Simberloff et al.  
109 2013, Gaeta et al. 2015), including for RES (Garcia-Díaz et al. 2017), influences the basking  
110 behavior of native WPT in the wild. If RES and WPT compete for basking sites and RES are  
111 dominant to WPT, then we predict that removing RES would lead to WPT basking activity  
112 becoming more concentrated at sites previously dominated by RES. However, if existing  
113 basking-site use patterns reflect species-specific habitat preferences, then we predict that  
114 removing RES would have minimal impact on WPT basking site use. Results from this  
115 experiment provide a useful first test of the impacts of introduced RES on native, wild turtles;  
116 these data are immediately relevant to management of WPT across its known range (Thomson et  
117 al. 2016), and for the undergoing Status Review for possible listing under the US Endangered  
118 Species Act (USFWS 2015)

## 119 **2.0 Methods**

120 *2.1 Study Site:* The UCD Arboretum waterway runs along the southern border of the university  
121 campus in Yolo County, CA, USA and is situated in the former channel of the North Fork of  
122 Putah Creek. Various sections of the waterway are bordered by urban, agricultural, and  
123 undeveloped natural landscapes (Fig. 1). For more detailed descriptions of the location, see  
124 Spinks et al. (2003) and Lambert et al. (2013).

125 *2.2 RES Removal:* In 2011, we captured turtles throughout the UCD Arboretum from 10 July–1  
126 August and again from 13–29 September. We primarily used baited traps that can be  
127 deployed in water depths of 0.5–2.0 m. Cumulative submersible trap effort was  
128 approximately 900 trap-nights. We supplemented our submersible trapping with  
129 opportunistic hand captures and dip netting, along with periodic deployment of a fyke net

130 and a basking trap. The submersible traps, fyke net, and basking trap were not biased towards  
131 any particular species, but hand captures and dip netting were targeted at RES. We recorded  
132 mass and plastron length of each captured RES using digital pan scales and dial calipers. We  
133 re-homed several captured RES with responsible pet owners and euthanized all other RES,  
134 donating the majority to the UC Davis School of Veterinary Medicine, the Natural History  
135 Museum of Los Angeles County, or the Museum of Wildlife and Fish Biology at UC Davis.  
136 All turtle handling was authorized under UC Davis IACUC Protocols #15263 and #16227,  
137 and California Department of Fish and Wildlife Scientific Collecting Permits #2480, #4307,  
138 and #11663.

139 To test whether our RES trapping success plateaued over time, which would suggest that  
140 our trapping effort removed the majority of the RES population, we analyzed whether the  
141 cumulative number of RES was better modeled by a linear or quadratic relationship across  
142 trapping days. We used linear regression and likelihood ratio tests to determine whether our  
143 trapping effort had minimal impact on the RES population (a linear fit) or resulted in fewer  
144 RES trapped each day (a quadratic fit). We also tested for an interaction between sex and  
145 trapping day to estimate whether we reduced the sexes at different rates.

146 *2.3 Turtle Monitoring:* From 18 March–22 April 2012, we conducted visual (with binoculars)  
147 surveys of the same set of 24 basking sites studied in spring 2010 prior to the RES removal  
148 (Fig. 1). Each basking site is a short stretch of shoreline (1–2 m long) with adjacent sites at  
149 least 3 m apart. We conducted surveys 2010 and 2012 surveys within a similar set of dates  
150 and times to make them as similar as possible. During each survey, we measured water  
151 temperature with a hand-held thermometer; we also obtained maximum daily temperature

152 data from the UC Davis Russel Ranch Weather Station, ca. 4 km northwest of the UCD  
153 Arboretum.

154 *2.4 Analysis:* The basking distribution of WPT and RES previously was shown to vary strongly  
155 along a west-east gradient, with WPT focused at the west end and RES focused at the east  
156 end of the waterway (Lambert et al. 2013). Because of this, we analyzed the relative and  
157 absolute basking abundances of both species, and the extent to which these changed after  
158 removing RES. We limited our analysis to 24 basking sites that had data available for every  
159 survey date within the same date range (March 18 to April 22) in 2010 (pre-RES removal,  
160 from Lambert et al. 2013) and in 2012 (post-RES removal, measured here).

161 To test for changes in the relative basking distribution of WPT to RES across the  
162 waterway, we used a generalized linear mixed effects model (GLMM) with a binomial  
163 family for proportion data using the ‘glmer’ function in the R package lme4. We used the  
164 distance of each basking site from the west end of the UCD Arboretum (following Lambert  
165 et al. 2013) as well as treatment (pre- or post-RES removal) as fixed effects and used  
166 observation date as a random effect to account for repeated measures of basking sites  
167 (Lambert et al. 2013). We first tested for a significant interaction between treatment and each  
168 basking site’s distance from the west end. If the interaction term was not significant, we  
169 removed it from the model. We then assessed the influence of the main effects and tested  
170 whether the relative basking distribution of WPT to RES differed pre- and post-RES removal  
171 using a Tukey’s post-hoc test with ‘glht’ function in the R package “multcomp”. We also  
172 performed binomial GLMMs for each basking site separately to explore whether individual  
173 basking sites show changes in the proportion of WPT to RES after the experiment.



174 For the absolute abundance of each species, we applied a similar modeling approach but  
175 used Poisson GLMMs for count data. We used the ‘r.squaredGLMM’ function in the  
176 package “MuMIn” to calculate  $R^2$  for GLMMs; ‘MuMIn’ calculates both a conditional  $R^2$   
177 ( $cR^2$ ) for the full model including fixed and random effects as well as a marginal  $R^2$  ( $mR^2$ )  
178 for just the model’s main effects. We conducted all analyses in R (version 3.2.2).

179 To further explore patterns at individual basking sites, we used contingency table  
180 analyses for each species independently to test whether certain basking sites comprised larger  
181 or smaller proportions of the total basking observations for either species pre- and post-RES  
182 removal. We focused on sites P, O, E, Q, and R which were, respectively, the five most  
183 heavily-used turtle basking sites (combined for both species) pre-RES removal. We also  
184 examined site X since it was the most heavily-used turtle basking site post-RES removal.

## 185 **3.0 Results**

186 *3.1 RES Removal:* In summer 2011, we captured and removed 180 RES from the UCD  
187 Arboretum. We removed 25 adult males, 71 adult females, and 84 juveniles (individuals with  
188 carapace length  $\leq 100$  mm, Ernst and Lovich 2009), including one individual of 113 mm  
189 carapace length that lacked sexually-diagnostic traits. We removed 59 RES that we had  
190 captured and marked in previous years and 121 unmarked individuals. All turtle marking  
191 previously occurred as part of the UC Davis Herpetology course from 2007 through spring  
192 2011. Of these new RES, 70% ( $n = 84$ ) were juveniles, 22% ( $n = 27$ ) were adult females, and  
193 8% ( $n = 10$ ) were adult males.

194 A likelihood ratio test supported a model (full model  $R^2 = 0.95$ ,  $p < 0.0001$ ) with a  
195 quadratic over a linear fit between cumulative RES trapped and trapping day ( $p < 0.0001$ )

196 and with an interaction between RES sex and trapping day ( $p < 0.001$ ). During the removal  
197 effort, captures of RES declined and leveled off, indicating that we removed a substantial  
198 portion of the catchable RES population. Furthermore, the significant interaction term  
199 suggests we depleted the male RES population faster than the female RES population (Fig.  
200 2). In total, we removed 104.5 kg of RES biomass, of which 79% (82.3 kg) was from adult  
201 females, 15% (15.5 kg) was from adult males, and 6% (6.7 kg) was from juveniles. During  
202 this same trapping effort, we captured, marked (or re-marked), and released 118 individual  
203 WPT, 14 of which were juveniles ( $\leq 110$ mm plastron length; Holland, 1991; Spinks et al.  
204 2003). While some aspects of our capture efforts in 2011 specifically targeted RES (e.g., dip  
205 netting and hand captures), our data indicate RES outnumbered WPT by about 1.5:1 at the  
206 start of the experiment.

207 *3.2 Basking Surveys:* We surveyed for 16 days from 18 March to 22 April 2010 (pre-removal)  
208 and 18 days from 18 March to 22 April 2012 (post-removal). Maximum daily air  
209 temperatures were not significantly different between years (two-tailed t-test,  $p = 0.74$ ; 2010,  
210  $19.2\text{ C} \pm 0.69\text{ SE}$ ; 2012,  $18.8\text{ C} \pm 0.88\text{ SE}$ ). However, in the two weeks prior to our surveys  
211 the maximum daily air temperatures were significantly warmer in 2012 ( $18.8\text{ C} \pm 1.08\text{ SE}$ )  
212 than in 2010 ( $15.2\text{ C} \pm 0.65\text{ SE}$ ); two-tailed t-test,  $p < 0.001$ ). Water temperature was  
213 significantly warmer (two-tailed t-test,  $p < 0.0001$ ) in 2010 ( $17.0\text{ C} \pm 0.24\text{ SE}$ ) compared to  
214 2012 ( $15.4\text{ C} \pm 0.36\text{ SE}$ ). In 2010, we recorded 283 WPT and 645 RES observations. In  
215 2012, we recorded only 43 WPT observations and 61 RES observations.

216 Pre-removal, we recorded WPT basking at 15 of the 24 basking sites, but post-removal  
217 we recorded WPT basking at only 8 of the 24 sites (Fig. 3). WPT were absent from eight  
218 sites that they used pre-removal, although six of these were used infrequently in 2010. We

219 recorded WPT using one additional site where they were not recorded pre-removal. In  
220 general, the basking sites most commonly used by WPT pre-removal were the same sites  
221 used post-removal (Fig. 3). Pre-removal, we recorded RES basking at 17 of the 24 basking  
222 sites, but post-removal we recorded RES basking at only 8 of the 24 sites (Fig. 3). RES were  
223 absent from nine sites that they used pre-removal and were not recorded using any new sites  
224 after the removal.

225 *3.3 Relative Abundance:* The interaction between distance from the west end of the waterway  
226 and treatment was not significant ( $p = 0.18$ ) and was removed from the model. Both distance  
227 from the west end ( $p < 0.0001$ ) and treatment ( $p < 0.0001$ ) were significant and were retained  
228 in the model ( $cR^2 = 0.31$ ,  $mR^2 = 0.31$ ). Both pre- and post-RES removal, the relative basking  
229 distribution of turtles was WPT-biased in the west end and RES-biased in the east end of the  
230 waterway (Fig. 4). Furthermore, the Tukey's post-hoc test indicated that the proportion of  
231 basking observations increased from 30.5% WPT pre-RES removal to 41.3% WPT post-RES  
232 removal ( $p < 0.0001$ ). The non-significant interaction term indicates that the RES removal  
233 did not change the relative basking distribution of the two species across the waterway.

234 Individual binomial GLMMs for each basking site returned a significant treatment effect  
235 for site Q ( $p = 0.002$ , 9% WPT to 55% WPT) and a marginally significant effect for site O ( $p$   
236  $= 0.09$ , 30% WPT to 75% WPT). All other basking sites showed no significant difference in  
237 the proportion of the two species between years (all  $p > 0.1$ ).

238 *3.4 WPT Absolute Abundance:* In 2010, we recorded 283 WPT basking observations and only 43  
239 in 2012. The Poisson GLMM indicated a significant interaction between treatment and  
240 distance from the west end ( $p = 0.012$ ,  $cR^2 = 0.23$ ,  $mR^2 = 0.06$ ), suggesting a shift in the

241 absolute basking distribution of WPT across the waterway. Individual GLMMs for each year  
242 indicate that distance from the west end is significant in the pre-RES removal year ( $p <$   
243  $0.012$ ,  $cR^2 = 0.27$ ,  $mR^2 = 0.03$ ) but not in the post-RES removal year ( $p = 0.55$ ). These  
244 results suggest that, before the RES removal, absolute basking abundance of WPT declined  
245 from west-east, and that post-RES removal WPT had a relatively even basking distribution  
246 throughout the UCD Arboretum (Fig. 5). Contingency tables indicated that sites Q ( $p = 0.01$ )  
247 and X ( $p = 0.001$ ) comprised larger proportions of total WPT basking observations post-RES  
248 removal than pre-RES removal. All other sites analyzed comprised similar proportions of  
249 total WPT basking observations before and after the experiment (all  $p > 0.1$ ), although small  
250 sample sizes often resulted in relatively little statistical power. Together, these analyses  
251 indicate removing RES resulted in a less clustered, more even distribution of WPT across  
252 basking sites with two sites towards the center-east and east of the Arboretum comprising  
253 more WPT basking activity.

254 *3.5 RES Absolute Abundance:* For RES, the GLMM indicated a significant interaction between  
255 distance to the west end and treatment ( $p < 0.0001$ ,  $cR^2 = 0.30$ ,  $mR^2 = 0.16$ ). While the  
256 number of RES basking observations was an order of magnitude lower in 2012 ( $n = 61$ )  
257 versus 2010 ( $n = 645$ ), the positive relationship between RES absolute abundance and the  
258 west-east gradient in the UCD Arboretum appears to be more pronounced post-RES removal  
259 (Figs. 3, 5). Individual GLMMs for each year show that distance to the west end was  
260 significant in the pre-RES removal year ( $p < 0.0001$ ,  $cR^2 = 0.27$ ,  $mR^2 = 0.02$ ) and the post-  
261 RES removal year ( $p < 0.0001$ ,  $cR^2 = 0.14$ ,  $mR^2 = 0.14$ ). In both years, the absolute  
262 abundance of basking RES increased along the west-east gradient pre (Fig. 5). After the  
263 RES-removal, RES were relatively sparse through the western and central portions of the

264 waterway and were concentrated in the far eastern end (Fig. 3, 5). Contingency table analyses  
265 indicated that sites E ( $p = 0.01$ ), O ( $p = 0.0004$ ), P ( $p = 0.0001$ ), and R ( $p = 0.03$ ) comprised  
266 lower proportions of total basking observations after the experiment and site X comprised a  
267 higher proportion ( $p = 0.001$ ). Site Q made up similar proportions of total RES observations  
268 in both years ( $p = 0.14$ ).

## 269 **4.0 Discussion**

270 To test whether non-native RES influence WPT basking site use, we removed 180 non-native  
271 RES, totaling over 100 kg of turtle biomass. This experiment represents a dramatic alteration to  
272 the turtle community inhabiting the UCD Arboretum. Our experiment indicated that removing  
273 the majority of the RES population altered the basking distribution of both native WPT and  
274 residual RES, and that some form of interspecific interactions is occurring between the two  
275 species. However, our results do not necessarily provide evidence for strong interspecific  
276 competition between introduced RES and WPT, and suggest that a more nuanced, complex set of  
277 interactions may be occurring in wild populations.

278 *4.1 Intraspecific Competition:* One of the clearest effects of our experiment was that the  
279 remaining post-removal RES abandoned several basking sites that they previously used heavily  
280 (particularly sites O and P) and shifted towards the east end of the transect (e.g., sites V and X).  
281 Although it is unclear what drove this shift, this result indicates that RES prefer habitat at this  
282 end of the waterway and that, prior to our experiment, RES densities were high enough for  
283 intraspecific competition among RES to force some individuals into other areas of the waterway.  
284 Our previous work showed that RES basking activity was highest at sites with shallow slopes,  
285 deeper water adjacent to the site, a steel mesh (rather than concrete or dirt) substrate, and high

286 human activity (Lambert et al. 2013). Consistent with these observations, the two basking sites  
287 that showed the most concentrated RES activity post-removal were comprised of steel mesh and  
288 were the sites with some of the flattest slopes and deepest water along the transect as well as the  
289 sites with the highest level of human activity (Lambert et al. 2013), indicating that residual RES  
290 concentrated their basking activity at the most preferred sites.

291

292 *4.2 Interspecific competition:* Previous work on the UCD Arboretum turtle population found that  
293 RES and WPT largely use different basking sites (Lambert et al. 2013). Before and after our  
294 experiment, WPT predominantly used the same basking sites but at different frequencies, with a  
295 general trend toward a more uniform west-east distribution post-removal. These results indicate  
296 that reducing the density of introduced RES allow WPT to spread out in the waterway. Even so,  
297 if sites towards the east end of the waterway which were previously dominated by RES (e.g.,  
298 sites O, P, Q, and R) are also preferred by WPT, then we would have expected WPT basking  
299 behavior to concentrate at these sites post-RES removal. But we did not see this. Rather, our  
300 experiment resulted in a shift in WPT basking activity suggesting that WPT basking is  
301 contingent on RES densities but we did not observe a dramatic shift that might be indicative of  
302 strong interspecific competition for basking sites. Competition is presumably greatest at high  
303 densities of RES and perhaps influenced by the relative densities of both species, as has been  
304 shown in other biological invasion scenarios (Gurnell et al. 2004). Earlier experiments have  
305 concluded that introduced RES outcompete native turtles for resources including basking sites or  
306 food. Because these experiments took place in artificial experimental venues and (Cadi and Joly  
307 2003, 2004, Polo-Cavia et al. 2008, 2010, 2011, Pearson et al. 2015), it is possible that prior  
308 conclusions about the competitive dominance of introduced RES were inflated. Although no

309 prior experiments have focused on WPT, some (Cadi and Joli 2003, 2004) have focused on  
310 European *Emys orbicularis*, which is a closely-related congener (Spinks et al. 2016).

311  
312 *4.3 Study Limitations:* Our analyses showed that WPT made up proportionally more of our  
313 observations after RES removal (Fig. 4). However, we recorded far fewer turtle basking  
314 observations for both species in 2012. For RES, this was expected as it was the goal of our  
315 experiment to reduce the RES population. This is not the case for WPT. It is possible that  
316 temperature or other environmental variation among years as well as unforeseen consequences of  
317 our manipulation resulted in reduced overall turtle basking activity after the RES removal. For  
318 instance, aquatic turtles like RES can dramatically influence trophic dynamics and aquatic  
319 ecosystem function (Lindsay et al. 2013). By removing a substantial portion of the turtle  
320 community, our experiment may have altered the availability and distribution of food resources  
321 which may have indirectly impacted where turtles chose to bask and turtle basking behavior  
322 generally, resulting in fewer observations. Unfortunately, we cannot distinguish whether the  
323 generally lower basking observations of WPT post-RES removal are an effect of our experiment  
324 or whether other uncontrolled factors may have resulted in fewer WPT basking observations.  
325 Because of logistical constraints, we were only able to collect a single of year of observations  
326 post-RES removal. We also recognize that our experiment did not address other putative axes of  
327 competition that are important for the continued recruitment and persistence of this WPT  
328 population. For example, evidence from experimental mesocosms suggests introduced RES  
329 generally eat more and grow faster than native turtles (Cadi and Joly 2003, Pearson et al. 2015),  
330 and these effects may have important consequences for native turtles.

331

332 *4.4 Management Implications:* Removing 180 RES from the UCD Arboretum was an intensive  
333 effort requiring over 2,000 person-hours of field work across forty days. Although WPT  
334 comprised a larger proportion of our basking observations post-removal (Fig. 4), RES still made  
335 up the dominant portion of our observations, summing to almost 60% of the total basking  
336 observations made after the experiment. In general, removing invasive species is difficult, time  
337 and labor intensive, and may still fail to extirpate the entire population, particularly in the face of  
338 continued introductions (Gaeta et al. 2015). In Europe, where RES removal is a widely  
339 advocated practice, recent work noted the severe challenges of functionally eradicating  
340 introduced RES (Garcia-Diaz et al. 2017). As long as RES are readily available in the pet trade,  
341 *de novo* introductions are likely to continue, complicating attempts to successfully eradicate  
342 introduced RES populations.

343 Our results suggest that a concerted effort at RES reduction in a large, complex water  
344 body has the potential to influence native turtle species, but that these influences may be  
345 relatively modest in their quantitative effects. Regardless of whether it is known that RES  
346 compete with a given native species, both removing non-native RES and stemming the future  
347 release of RES are important steps for reducing possible disease and parasite transmission  
348 (Héritier et al. 2017; Demkowska-Kutrzepa et al. 2018). Further, removals and reductions in pet  
349 releases could help minimize competition if it is occurring, whether that be for food, basking  
350 sites, or other resources. Although the commitment of time and energy is large, we encourage  
351 conservation biologists to treat RES removal efforts as experiments, as was done here, and test  
352 whether removing RES benefits native turtle species along these other ecological axes.

353 Habitat modification due to urban and agricultural land use is a major threat to WPT in  
354 California (Thomson et al. 2016). Nonetheless, human-modified habitats can be valuable



355 resources for WPT when appropriate conservation and management efforts are implemented  
356 (Spinks et al. 2003, Thomson et al. 2010, 2016). Directly managing urban basking habitat may  
357 be a particularly tractable conservation activity for WPT in addition to directly managing non-  
358 native RES. Future experiments and management practices can readily manipulate these basking  
359 site characteristics to test whether doing so is beneficial for WPT. Emerging research from the  
360 UCD Arboretum suggests that experimentally-added floating logs are preferred by WPT over  
361 bank-side basking and are more heavily used by WPT than RES especially when placed further  
362 from human activities (Cossman et al. unpubl.). In our experiment here, we may have liberated  
363 parts of the waterway that were previously dense with turtles generally, thus allowing WPT to  
364 spread out across the waterway. However, because WPT did not concentrate their basking  
365 activity at sites previously dominated by RES, these two species may not intensely compete for  
366 bank-side basking sites in this waterway. WPT may ultimately show little preference for  
367 particular bank-side basking site characteristics, although this warrants further study. Providing  
368 more basking sites of suitable quality, and particularly further from high levels of human  
369 activity, may be a feasible and fruitful management practice in conjunction with removing RES.  
370 We encourage additional research into the merits of this strategy.

371 *4.5 Conclusions:* Evidence from laboratory and mesocosm studies indicates that introduced RES  
372 are competitively dominant to native turtles. Here, we offer the first experimental test for  
373 competition between native turtles and non-native RES in the wild; our work provides insight  
374 into the seemingly complex nature of competition between introduced RES and native turtles.  
375 Our population manipulation suggests that reducing the density of RES may alter the basking  
376 activity of threatened WPT but that RES and WPT may not compete intensely for basking sites.  
377 We found strong evidence for strong intraspecific competition for basking sites at high RES

378 densities, and that reducing that competition may have had additional effects on the distribution  
379 of WPT basking. We hope that our study will encourage further field-based experiments to better  
380 understand the extent to which RES are competing with native turtles for basking sites and/or  
381 other resources, and to explore which management practices are both reasonable and effective.

382

383 *Acknowledgments:* This work was initiated while all authors were at UC Davis. This research did  
384 not receive any specific grant from funding agencies in the public, commercial, or  
385 not-for-profit sectors. There are no financial benefits that can arise from this work. We thank  
386 Ellen Zagory, Shannon Still, and the staff of the UCD Arboretum and Public Garden for  
387 assistance with this experiment and for access to GIS files. Members of the Peter Moyle Lab and  
388 Janet Foley Lab provided equipment and supplies for removing RES. Nick Buckmaster, Lauren  
389 Cassidy, Jillian Howard, Anna Jordan, Brian Mahardja, Hilary Rollins, Bryce Sullivan, and  
390 Matthew Young provided invaluable field assistance. The UCD Arboretum is heavily used by  
391 UC Davis affiliates and members of the public; we thank the many Arboretum visitors who were  
392 curious about our research and/or who encouraged our activities.

393

394 **Literature Cited**

- 395 Arvy, C. 1997. Le commerce de *Trachemys scripta elegans* : une menace d'expansion de  
396 l'espece dans le monde entire. Bulletin de la Societe Herpetologique de France 84 :15-24.
- 397 Arvy, C., and J. Servan. 1998. Imminent competition between *Trachemys scripta* and *Emys*  
398 *orbicularis* in France. Mertensiella 10:33-40.
- 399 Bury, R. B. and D. J. Germano. 2008. *Actinemys marmorata* (Baird and Girard 1852) – western  
400 pond turtles, Pacific pond turtles. Chelonian Research Monographs 5: 001.1-001.9.
- 401 Cadi, A. and P. Joly. 2003. Competition for basking places between the endangered European  
402 pond turtle (*Emys orbicularis galloitalica*) and the introduced red-eared slider  
403 (*Trachemys scripta elegans*). Canadian Journal of Zoology 81: 1392-1398.
- 404 Cadi, A. and P. Joly. 2004. Impact of the introduction of the red-eared slider (*Trachemys scripta*  
405 *elegans*) on survival rates of the European pond turtle (*Emys orbicularis*). Biodiversity  
406 and Conservation 13: 2511-2518.
- 407 Cadi, A., Teillac., Delmas, V., Girondot, M., Servais, V., and A-C. Prevot-Julliard. 2008. Slider  
408 turtles *Trachemys scripta elegans* released in France: a case of integrated research and  
409 conservation program. Revista Española de Herpetología 22: 111-114.
- 410 Costa, Z. J. 2014. Responses to predators differ between native and invasive freshwater turtles:  
411 environmental context and its implications for conservation. Ethology 120: 1-8.
- 412 Demkowska-Kutrzepa, M., M. Studzinska, M. Roczen-Karcmarz, K. Tomczuk, Z. Abbas, and P.  
413 Rózanski. 2018. A review of the helminths co-introduced with *Trachemys scripta*  
414 *elegans*—A threat to European native turtle health. Amphibia-Reptilia IN PRESS.

- 415 Ernst, C. H. and J. E. Lovich. 2009. Turtles of the United States and Canada. Johns Hopkins  
416 University Press, 2<sup>nd</sup> Ed. 840 pages.
- 417 Gaeta, J. W., Hrabik, T. R., Sass, G. G., Roth, B. M., Gilber, S. J., and M. J. Vander Zanden.  
418 2015. A whole-lake experiment to control invasive rainbow smelt (*Actinopterygii*,  
419 *Osmeridae*) via overharvest and a food web manipulation. *Hydrobiologia* 746: 433-444.
- 420 Garcia-Diaz, P., Ramsey, D. S. L., Woolnough, A. P., Franch, M., Llorente, G. A., Montori, A.,  
421 Buenetxea, X., Larrinaga, A. R., Lasceve, M., Alvarez, A., Traverso, J. M., Valdeon, A.,  
422 Crespo, A., Rada, V., Ayllon, E., Sancho, V., Lacomba, J. I., Bataller, J. V., and M.  
423 Lizana. 2017. Challenges in confirming eradication success of invasive red-eared sliders.  
424 *Biological Invasions* 19: 2739-2750.
- 425 Gurnell, J., Wauters, L. A., Lurz, P. W. W., and G. Tosi. 2004. Alien species and interspecific  
426 competition: effects of introduced eastern grey squirrels on red squirrel population  
427 dynamics. *Journal of Animal Ecology* 73: 26-35.
- 428 Héritier, L., A. Valdeón, A. Sadaoui, T. Gendre, S. Ficheux, S. Bouamer, N. Kechemir-Issad, L.  
429 Du Preez, C. Palacios, and O. Verneau. 2017. Introduction and invasion of the red-eared  
430 slider and its parasites in freshwater ecosystems of southern Europe: Risk assessment for  
431 the European pond turtle in wild environments. *Biodiversity and Conservation* 26:1817-  
432 1843.
- 433 Holland, D. C. 1991. A Synopsis of the Ecology and Status of the Western Pond Turtle *Clemmys*  
434 *marmorata* in 1991. Report to National Ecological Research Center. United States Fish  
435 and Wildlife Service, San Simeon, CA.

- 436 Knapp, R. A., Boiana, D. M., and V. T. Vredenburg. 2007. Removal of nonnative fish results in  
437 population expansion of a declining amphibian (mountain yellow-legged frog, *Rana*  
438 *muscosa*). *Biological Conservation* 135: 11-20.
- 439 Krauss, F. 2009. Alien reptiles and amphibians, a scientific compendium and analysis. Springer,  
440 Netherland. 563 pp.
- 441 Kuebbing, S. E. and D. Simberloff. 2015. Missing the bandwagon: nonnative species impacts  
442 still concern managers. *NeoBiota* 25: 73-86.
- 443 Lambert, M. R., Nielsen, S. N., Wright, A. N., Thomson, R. C., and H. B. Shaffer. 2013. Habitat  
444 features determine the basking distribution of introduced red-eared sliders and native  
445 western pond turtles. *Chelonian Conservation and Biology* 12: 192-199.
- 446 Lindsay, M. K., Zhang, Y., Forstner, M. R. J., and D. Hahn. 2013. Effects of the freshwater turtle  
447 *Trachemys scripta elegans* on ecosystem functioning: an approach in experimental  
448 ponds. *Amphibian-Reptilia* 34: 75-84.
- 449 Lowe, S., Browne, M., Boudjelas, S., and M. De Poorter. 2000. 100 of the World's Worst  
450 Invasive Alien Species. A selection from the global invasive species database. The  
451 Invasive Species Specialist Group (ISSG) of the Species Survival Commission (SSC) of  
452 the World Conservation Union (IUCN), 12 pp.
- 453 Pearson, S. H., Avery, H. W., Kilham, S. S., Velinsky, D. J., and J. R. Spotila. 2013. Stable  
454 isotopes of C and N reveal habitat dependent dietary overlap between native and  
455 introduced turtles *Pseudemys rubiventris* and *Trachemys scripta*. *PLoS ONE*:  
456 <https://doi.org/10.1371/journal.pone.0062891>

- 457 Pearson, S. H., Avery, H. W., and J. R. Spotila. 2015. Juvenile invasive red-eared slider turtles  
458 negatively impact the growth of native turtles: implications for global freshwater turtle  
459 populations. *Biological Conservation* 186: 115-121.
- 460 Polo-Cavia, N., Lopez, P., and J. Martin. 2008. Interspecific differences in responses to predation  
461 risk may confer competitive advantages to invasive freshwater turtle species. *Ethology*  
462 114: 115-123.
- 463 Polo-Cavia, N., Lopez, P., and J. Martin. 2010. Competitive interactions during basking between  
464 native and invasive freshwater turtle species. *Biological Invasions* 12: 2141-2152.
- 465 Polo-Cavia, N., Lopez, P., and J. Martin. 2011. Aggressive interactions during feeding between  
466 native and invasive freshwater turtles. *Biological Invasions* 13: 1387-1396.
- 467 Rhodin, A. G. J., Iverson, J. B., Bour, R., Fritz, U., Georges, A., Shaffer, H. B., and P. P. van  
468 Dijk. 2017. *Turtles of the World. Annotated checklist and atlas of taxonomy, synonymy,*  
469 *distribution, and conservation status (8<sup>th</sup> Ed.). Chelonian Research Monographs 7: 1-292.*
- 470 Skelly, D. K. and J. M. Kiesecker. 2001. Venue and outcome in ecological experiments:  
471 manipulations of larval anurans. *Oikos* 94: 198-208.
- 472 Skelly, D. K. 2002. Experimental venue and estimation of interaction strength. *Ecology* 83:  
473 2097-2101.
- 474 Simberloff, D., Martin, J-L., Genovesi, P., Maris, V., Wardle, D. A., Aronson, J., Courchamp, F.,  
475 Galil, B., Garcia-Berthou, E., Pascal, M., Pysek, P., Sousa, R., Tabacchi, E., and M. Vila.  
476 2013. Impacts of biological invasions: what's what and the way forward. *Trends in*  
477 *Ecology and Evolution* 28: 58-66.

- 478 Spinks, P. Q., Pauly, G. B., Crayon, J. J., and H. B. Shaffer. 2003. Survival of the western pond  
479 turtle (*Emys marmorata*) in an urban California environment. *Biological Conservation*  
480 113: 257-267.
- 481 Spinks, P. Q., Thomson, R. C., McCartney-Melstad, E., and H. B. Shaffer. 2016. Phylogeny and  
482 temporal diversification of the New World pond turtles (Emydidae). *Molecular*  
483 *Phylogenetics and Evolution* 103 85-97.
- 484 Thomson, R. C., Spinks, P. Q., and H. B. Shaffer. 2010. Distribution and abundance of invasive  
485 red-eared sliders (*Trachemys scripta elegans*) in California's Sacramento River Basin and  
486 possible impacts on native western pond turtles (*Emys marmorata*). *Chelonian*  
487 *Conservation and Biology* 9: 297-302.
- 488 Thomson, R. C., Wright, A. N., and H. B. Shaffer. 2016. California amphibian and reptile  
489 species of special concern. University of California Press, Oakland, CA. 408 pp.
- 490 United States Fish & Wildlife Service. 2015. Endangered and threatened wildlife and plants; 90-  
491 day findings on 10 petitions. *Federal Register* 80: 19259–19263.
- 492 Vredenburg, V. T. 2004. Reversing introduced species effects: experimental removal of  
493 introduced fish leads to rapid recovery of a declining frog. *Proceedings of the National*  
494 *Academy of Sciences* 101: 7646-7650.
- 495 Walston, L. J. and S. J. Mullin. 2007. Responses of a pond-breeding amphibian community to  
496 the experimental removal of a predatory fish. *The American Midland Naturalist* 157: 63-  
497 73.

498 Winkler, J. D. and J. Van Buskirk. 2012. Influence of experimental venue on phenotype:  
499 multiple traits reveal multiple answers. *Functional Ecology* 26: 513-521.



500 **Figures and Figure Legends**

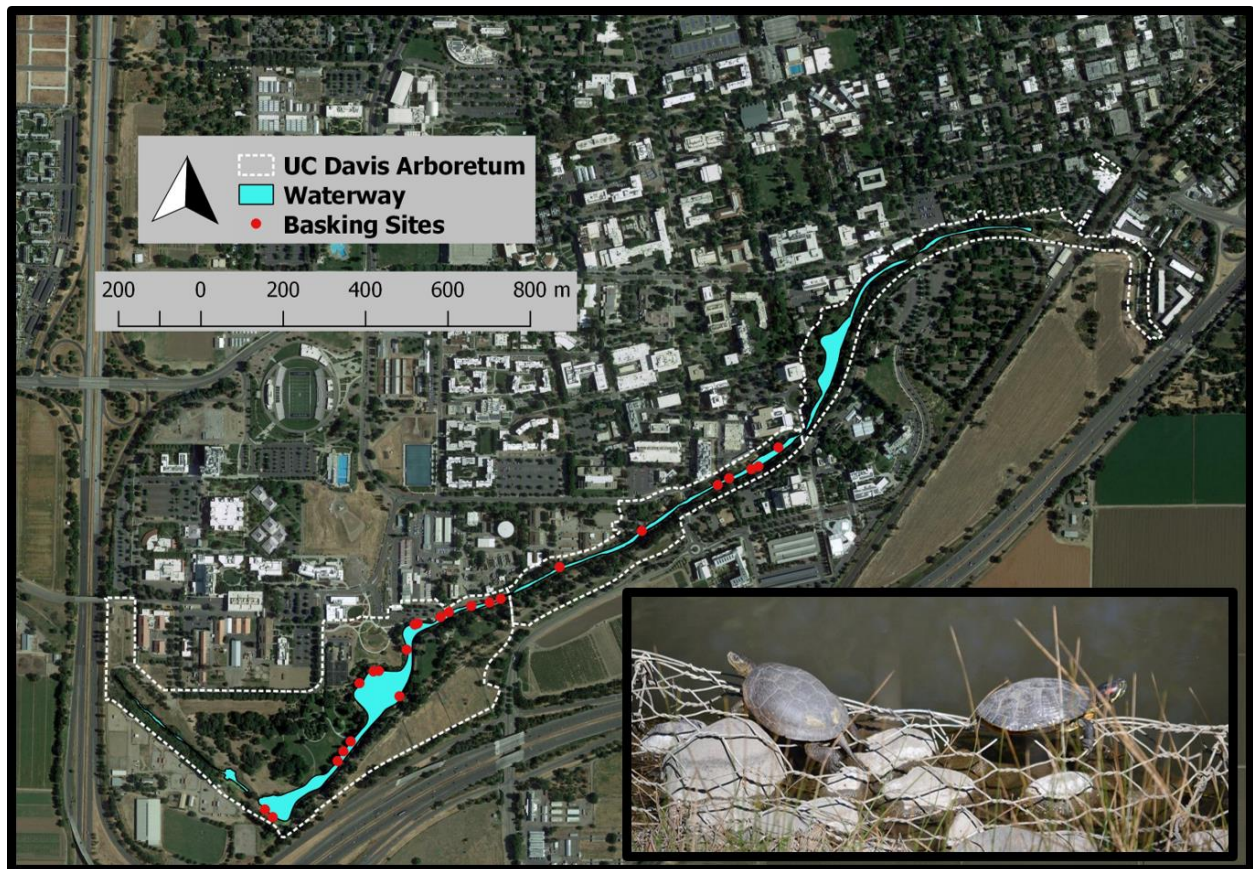

502 **Figure 1** (1.5 columns, color online only): Map of the UC Davis Arboretum waterway and turtle  
503 basking sites monitored before and after the red-eared slider population reduction. Inset are a  
504 native western pond turtle (left) and a non-native red-eared slider (right) basking in the UC Davis  
505 Arboretum. Photo by M. Lambert.

506

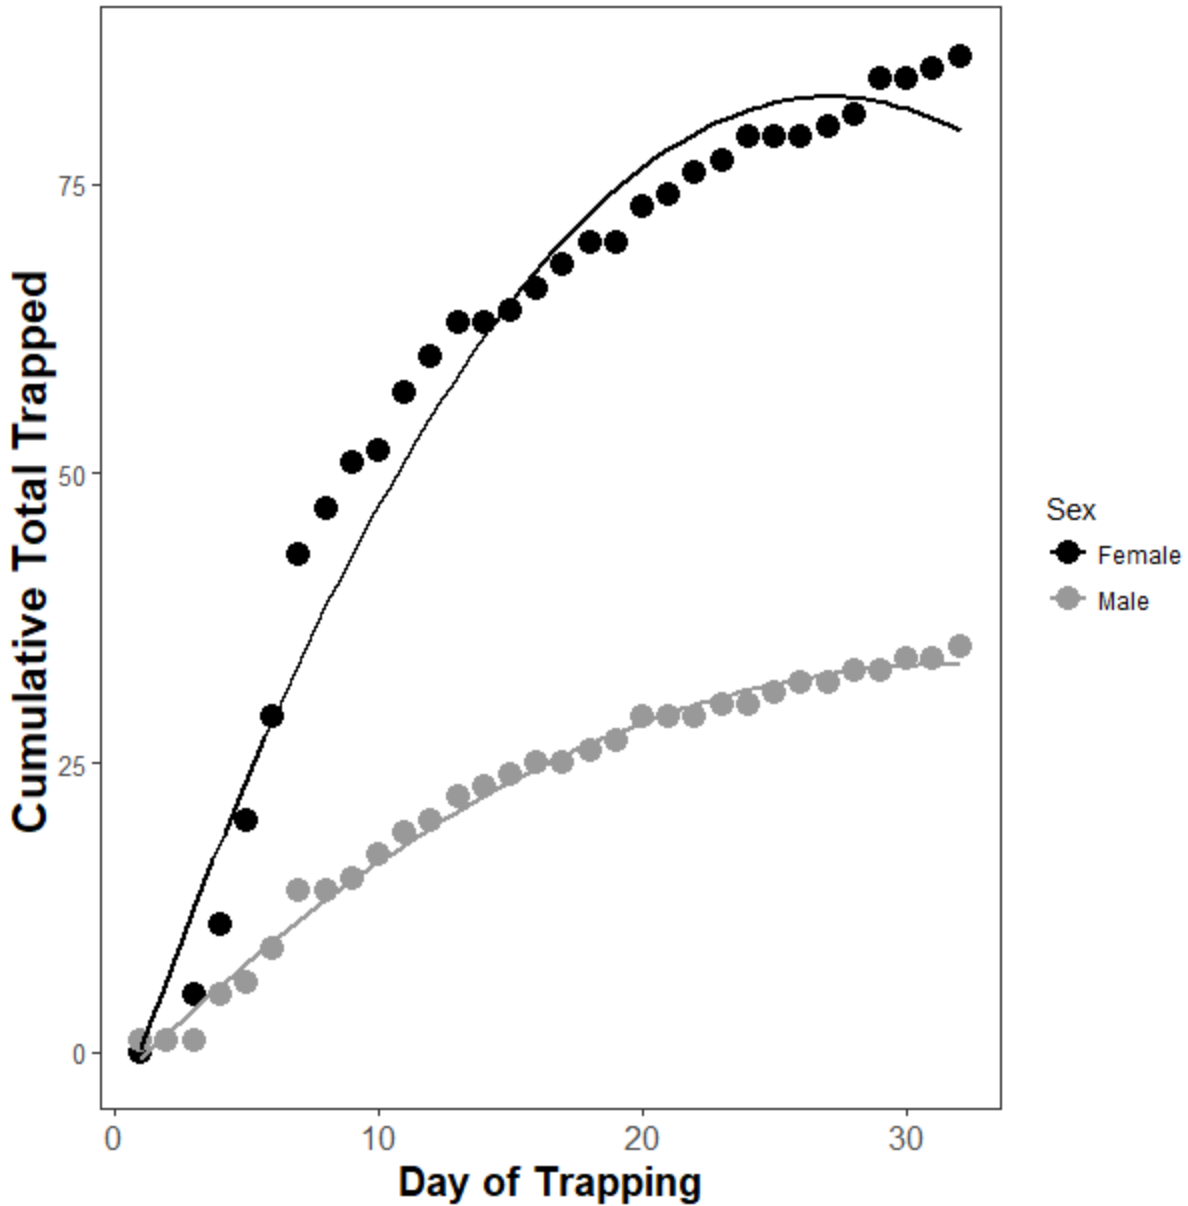

507

508 **Figure 2** (single column). Cumulative total number of adult female and male red-eared sliders  
509 (RES; *Trachemys scripta elegans*) removed from the UC Davis Arboretum in 2011. Trap Day 1–  
510 18 are in July and 19–32 are in September.

511

512

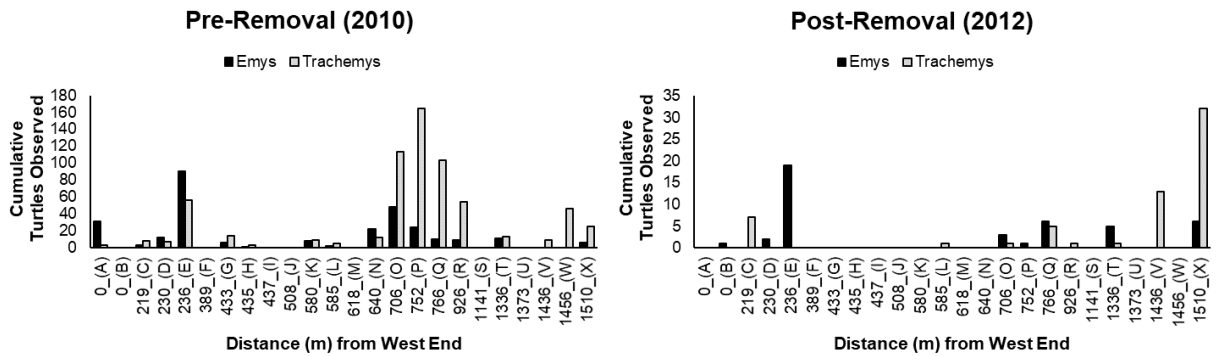

513

514 **Figure 3** (double column). The cumulative number of western pond turtle (WPT; *Emys*  
515 *marmorata*) and red-eared slider (RES; *Trachemys scripta elegans*) basking observations across  
516 sampling dates in the pre- and post-RES removal years. Letters in parentheses under the x-axis  
517 are basking site identifiers. Note that y-axes of the two panels have different scales.

518

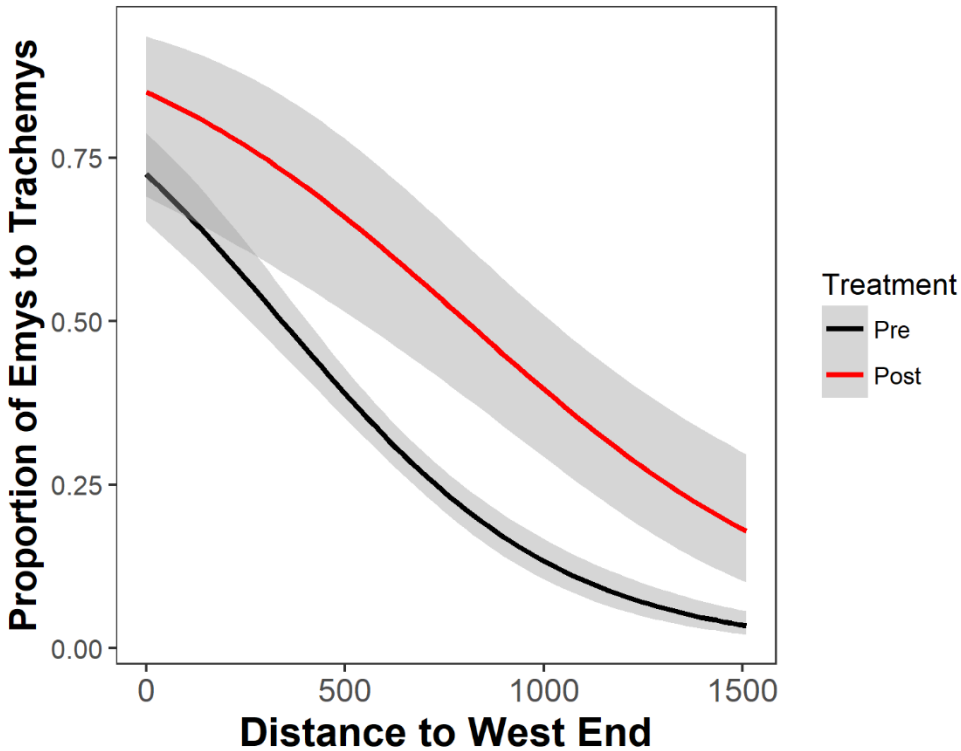

519

520 **Figure 4** (single column, color in print). The modeled proportion of western pond turtles (WPT;  
521 *Emys marmorata*) to red-eared sliders (RES; *Trachemys scripta elegans*) basking along a west-  
522 east gradient in the UC Davis Arboretum. While WPT made up a greater proportion of  
523 observations in 2012 than in 2010, the relative basking distribution of the two species along the  
524 Arboretum did not change between pre- and post-RES reduction years. Curves are binomial fits  
525 and gray shading represents 95% confidence intervals.

526

527

528

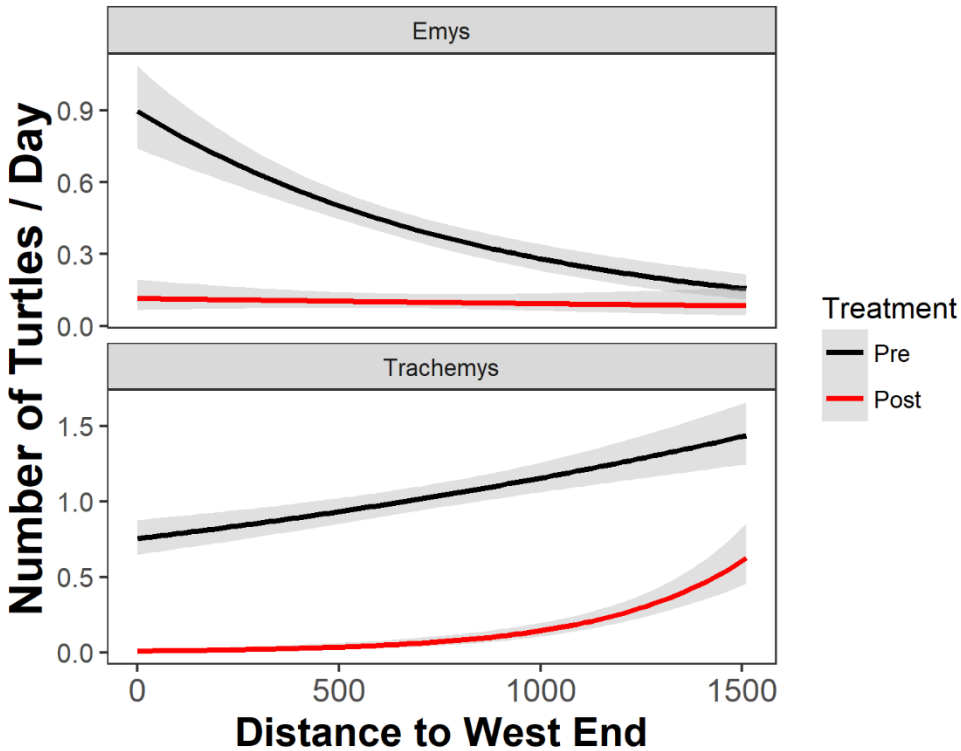

529

530 **Figure 5** (single column, color in print). The modeled number of western pond turtles (WPT;  
531 *Emys marmorata*) and red-eared sliders (RES; *Trachemys scripta elegans*) observed basking  
532 along a west-east gradient at the UC Davis Arboretum pre- and post-RES removal. Note that  
533 fewer turtles were observed basking in the post-RES removal survey. Curves are Poisson fits and  
534 gray shading represents 95% confidence intervals.
